# Supplementary material for: Interactions of 1,5-naphthyridine with Pd(en)Cl2 or [Pd(en)(H2O)2](NO3)2 in aqueous solution
Source: Royal Society of Chemistry journal article supplement (doi:10.1039/b810487e), 2008-01-01
Supplement: b810487e.pdf [file b810487e.pdf]

## Supporting Information

Figure S1. Titration and fitted curve of 1.00 mM 1,5-NAP-[Pd(en)(H<sub>2</sub>O)<sub>2</sub>](NO<sub>3</sub>)<sub>2</sub> with 1 equivalent HNO<sub>3</sub> at 298K, I=0.1 M NaNO<sub>3</sub>.

Figure S2. <sup>1</sup>H NMR spectrum of 10 mM 1,5-NAP in D<sub>2</sub>O, pD 6.3, 26 °C.

Figure S3. <sup>1</sup>H NMR spectrum of Pd(en)Cl<sub>2</sub>-1,5-NAP in D<sub>2</sub>O at 1:1 mole ratio, 10 mM total conc., pD 6.3, 26 °C.

Figure S4. <sup>1</sup>H NMR spectrum of Pd(en)Cl<sub>2</sub>-1,5-NAP in D<sub>2</sub>O at 2:1 mole ratio, 10 mM total conc., pD 6.3, 26 °C.

Figure S5. <sup>1</sup>H NMR spectrum of Pd(en)Cl<sub>2</sub>-1,5-NAP in D<sub>2</sub>O at 1:2 mole ratio, 10 mM total conc., pD 6.3, 26 °C.

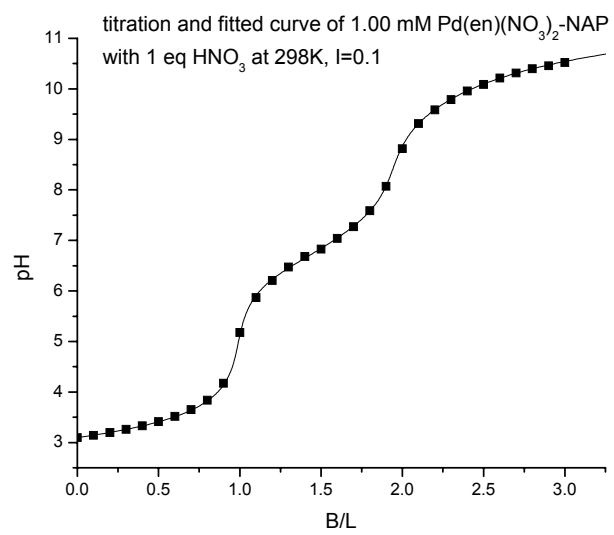

Figure S1

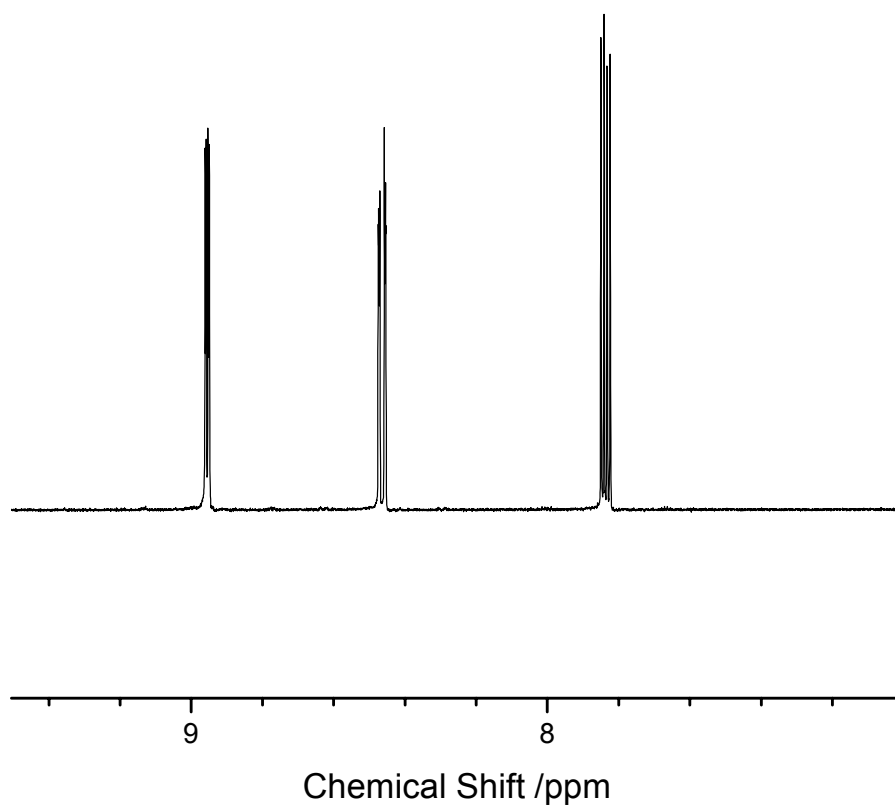

Figure S2. <sup>1</sup>H NMR spectrum of 10 mM 1,5-NAP in D<sub>2</sub>O, pD 6.3, 26 °C.

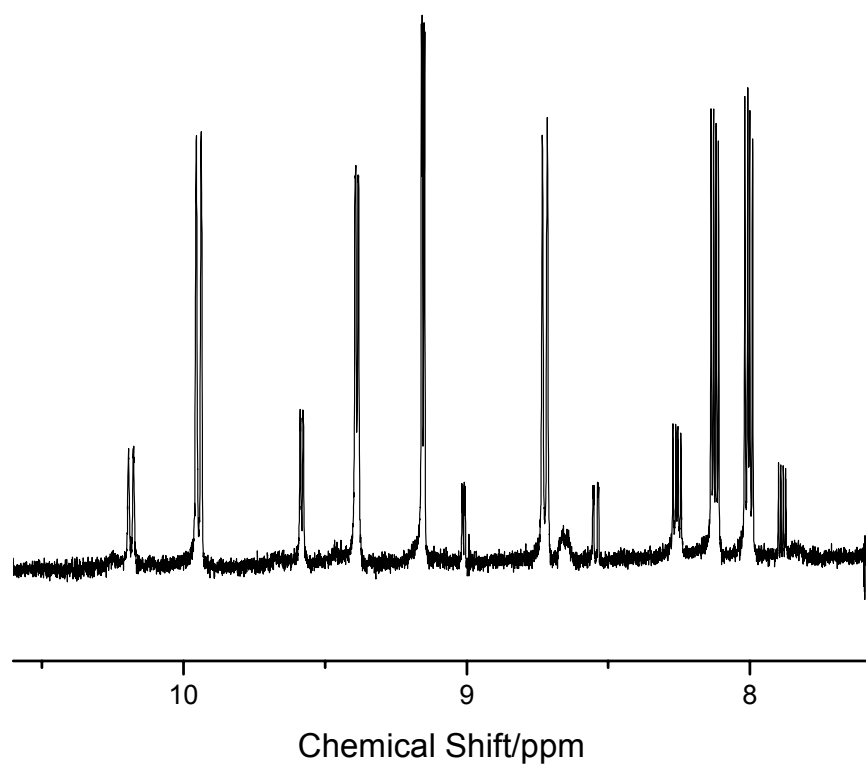

Figure S3. <sup>1</sup>H NMR spectrum of Pd\*en)Cl<sub>2</sub>-1,5-NAP in D<sub>2</sub>O at 1:1 mole ratio, 10 mM total conc., pD 6.3, 26°C

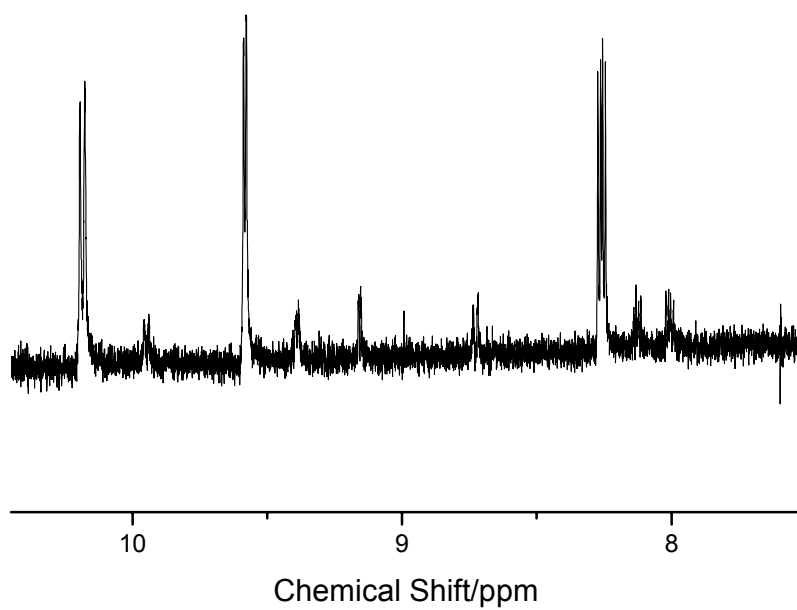

Figure S4.  $^1\text{H}$  NMR spectrum of  $\text{Pd}(\text{en})\text{Cl}_2\text{-1,5-NAP}$  in  $\text{D}_2\text{O}$  at 9:1 mole ratio, 10 mM total conc., pD 6.3, 26  $^\circ\text{C}$ .

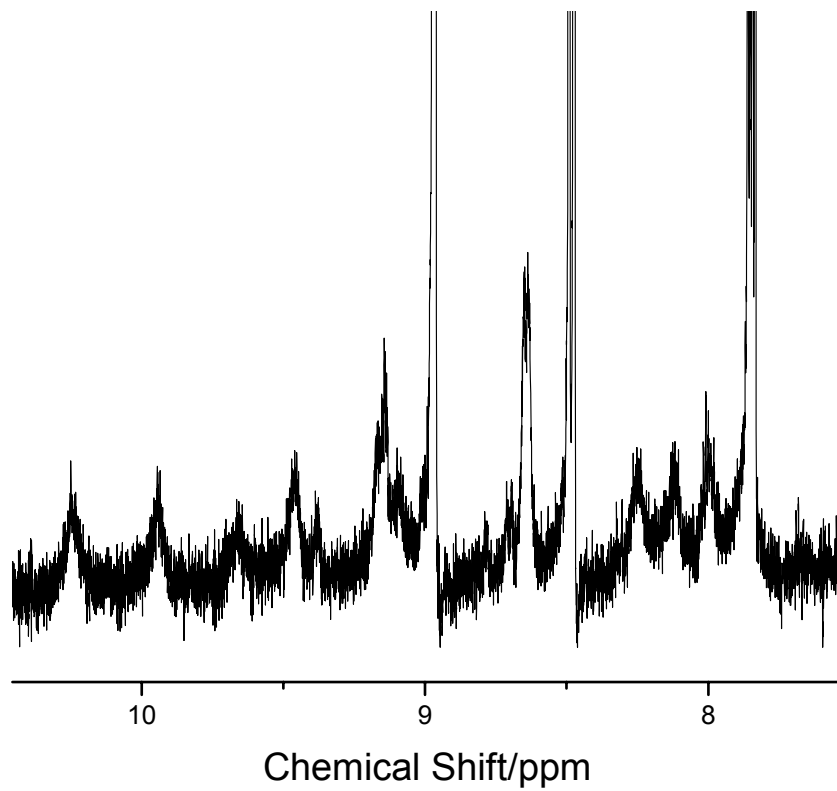

Figure S5.  $^1\text{H}$  NMR spectrum of  $\text{Pd}(\text{en})\text{Cl}_2$  in  $\text{D}_2\text{O}$  at 1:9 mole ratio, 10 mM total conc., pD 6.3,  $26^\circ\text{C}$ ; also contains some 1:1 and substantial free 1,5-NAP.
